# Supplementary material for: In situ investigation of moisture sorption mechanism in fuel cell catalyst layers
Source: Royal Society of Chemistry journal article supplement (doi:10.1039/d4ya00164h), 2024-01-01
Supplement: d4ya00164h1.pdf [file d4ya00164h1.pdf]

## In situ investigation of moisture sorption mechanism in fuel cell catalyst layers

Emilie Planes<sup>1,\*</sup>, Joseph Peet<sup>2</sup>, Jean-Blaise Brubach<sup>3</sup>, Lionel Porcar<sup>4</sup>, Gilles De Moor<sup>1</sup>, Cristina Iojoiu<sup>1,\*</sup>, Sandrine Lyonnard<sup>2,\*</sup>

<sup>1</sup> Université Grenoble Alpes, Université Savoie Mont-Blanc, CNRS, Grenoble INP, LEPMI, 38000 Grenoble, France

<sup>2</sup> Univ. Grenoble Alpes, CEA, CNRS, Grenoble INP, IRIG, SyMMES, 38000 Grenoble, France

<sup>3</sup> Synchrotron SOLEIL, L'Orme des Merisiers Saint-Aubin, BP 48, 91192 Gif-sur-Yvette, France

<sup>4</sup> Institut Laue Langevin, ILL, Avenue des Martyrs, Grenoble, France.

\*Corresponding authors: [emilie.planes@univ-smb.fr](mailto:emilie.planes@univ-smb.fr) ; [cristina.iojoiu@grenoble-inp.fr](mailto:cristina.iojoiu@grenoble-inp.fr) ; [sandrine.lyonnard@cea.fr](mailto:sandrine.lyonnard@cea.fr)

## Supporting information

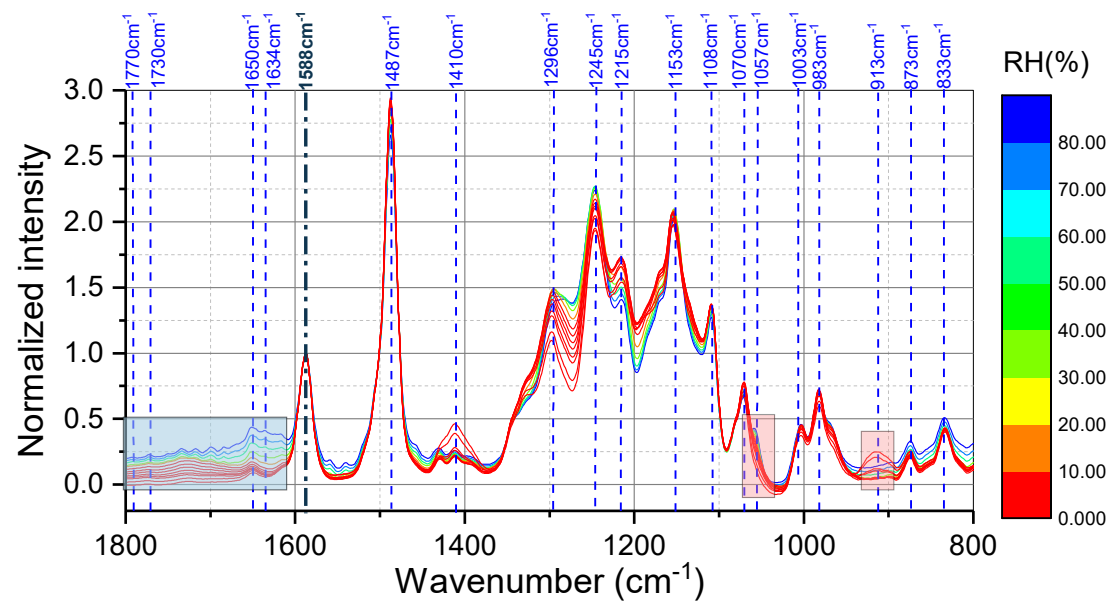

Figure S1: MIR spectra of the IN1515 membrane recorded across the 800-1800  $\text{cm}^{-1}$  range while varying relative humidity. The primary spectral bands are highlighted with blue dotted lines, and their assignments are detailed in table S1. The bands associated with water and ionic functionalities are visually distinguished by framing them in blue and red, respectively. (The band at 1588  $\text{cm}^{-1}$  indicated in black is the one used for normalizing the spectra)

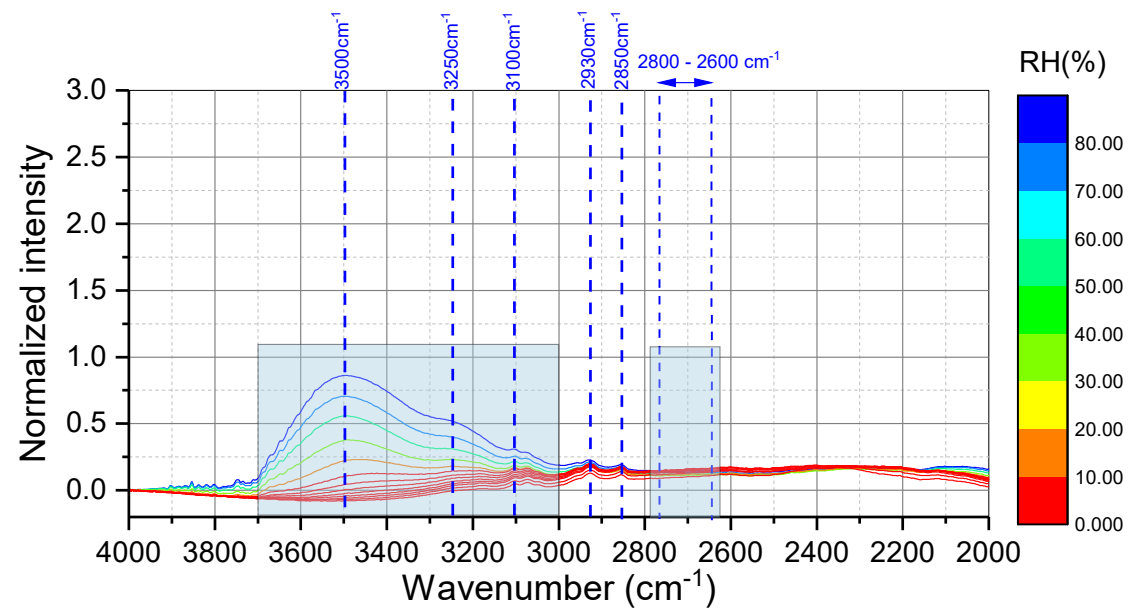

Figure S2: MIR spectra of the IN1515 membrane recorded across the 2000-4000 cm<sup>-1</sup> range while varying relative humidity. The primary spectral bands are highlighted with blue dotted lines, and their assignments are detailed in table S1. The bands associated with water are visually distinguished by framing them in blue.

|           | Band (cm <sup>-1</sup> ) | Assignments                                                                                                                                      | Backbone | Ionic functions | Water | Ref |
|-----------|--------------------------|--------------------------------------------------------------------------------------------------------------------------------------------------|----------|-----------------|-------|-----|
| 1         | 833                      | C-H in benzene ring                                                                                                                              | X        |                 |       | 1   |
| 2         | 873                      | C-H in benzene ring                                                                                                                              | X        |                 |       | 1   |
| 3         | 913                      | S-OH sym. Stretching in SO <sub>3</sub> H                                                                                                        |          | X               |       | 2   |
| 4         | 983                      | C-O-C sym. Stretching                                                                                                                            | X        | X               |       | 2   |
| 5         | 1003                     | C-H bending in benzene ring                                                                                                                      | X        |                 |       | 1   |
| 6         | 1057                     | S=O stretching in SO <sub>3</sub> <sup>-</sup> ...H <sub>3</sub> O <sup>+</sup> /H <sub>2</sub> O                                                |          | X               |       | 2   |
| 7         | 1070                     | C-H bending in benzene ring                                                                                                                      | X        |                 |       | 1   |
| 8         | 1108                     | SO <sub>2</sub> assym. Stretching in backbone                                                                                                    | X        |                 |       | 3   |
| 9         | 1153                     | CF <sub>2</sub> sym. Stretching + SO <sub>2</sub> sym stretching in backbone. + SO <sub>2</sub> assym stretching in SO <sub>3</sub> <sup>-</sup> | X        | X               |       | 3,4 |
| 10        | 1215                     | CF <sub>2</sub> assym. Stretching + SO <sub>2</sub> sym stretching in SO <sub>3</sub> <sup>-</sup>                                               | X        | X               |       | 4   |
| 11        | 1245                     | C-C stretching in benzene ring                                                                                                                   | X        |                 |       | 1   |
| 12        | 1296                     | C-C stretching + C-O-C in backbone                                                                                                               | X        |                 |       | 3   |
| 13        | 1410                     | Benzene ring                                                                                                                                     | X        |                 |       | 3   |
| 14        | 1487                     | Benzene ring                                                                                                                                     | X        |                 |       | 3   |
| <b>15</b> | <b>1588*</b>             | <b>Benzene ring</b>                                                                                                                              | <b>X</b> |                 |       | 3   |
| 16        | 1634                     | H-O-H bending in H <sub>2</sub> O                                                                                                                |          |                 | X     | 2,5 |
| 17        | 1650                     | H-O-H bending in H <sub>3</sub> O <sup>+</sup> , in H <sup>+</sup> H <sub>2</sub> O                                                              |          |                 | X     | 2,5 |
| 18        | 1730                     | Zundel ions H <sub>5</sub> O <sub>2</sub> <sup>+</sup>                                                                                           |          |                 | X     | 2,5 |
| 19        | 1770                     | H <sub>3</sub> O <sup>+</sup> ions                                                                                                               |          |                 | X     | 2,5 |
| 20        | 2600-2800                | OH stretching in H <sub>3</sub> O <sup>+</sup>                                                                                                   |          |                 | X     | 2   |
| 21        | 2850                     | C-H stretching                                                                                                                                   | X        |                 |       | 5   |
| 22        | 2930                     | C-H stretching                                                                                                                                   | X        |                 |       | 5   |
| 23        | 3100                     | OH stretching in Zundel ions                                                                                                                     |          |                 | X     | 2,5 |
| 24        | 3250                     | OH sym. stretching in H <sub>2</sub> O                                                                                                           |          |                 | X     | 2,5 |
| 25        | 3500                     | OH assym. stretching in H <sub>2</sub> O                                                                                                         |          |                 | X     | 2,5 |

Table S1: Assignments of bands indicated on MIR spectra of IN1515 membrane presented in Figures S1 and S2. The bands have been sorted according to their categories: ionomer skeleton, ionic function, and water. The references used for these assignments are indicated in the last column.

- (1) Nakanishi, K.; Solomon, P. H. *Infrared Absorption Spectroscopy*; Holden-Day, 1977.
- (2) Dalla Bernardina, S.; Brubach, J.-B.; Berrod, Q.; Guillermo, A.; Judeinstein, P.; Roy, P.; Lyonnard, S. Mechanism of Ionization, Hydration, and Intermolecular H-Bonding in Proton Conducting Nanostructured Ionomers. *J. Phys. Chem. C* **2014**, *118* (44), 25468–25479. <https://doi.org/10.1021/jp5074818>.
- (3) Alenazi, N. A.; Hussein, M. A.; Alamry, K. A.; Asiri, A. M. Nanocomposite-Based Aminated Polyethersulfone and Carboxylate Activated Carbon for Environmental Application. A Real Sample Analysis. *C*. 2018. <https://doi.org/10.3390/c4020030>.
- (4) Moukheiber, E. Understanding of the Structure of Perfluorinated Sulfonic Membranes for Fuel Cell, Université de Grenoble, 2011.
- (5) Nguyen, H. D.; Porihel, R.; Brubach, J. B.; Planes, E.; Soudant, P.; Judeinstein, P.; Porcar, L.; Lyonnard, S.; Iojoiu, C. Perfluorosulfonyl Imide versus Perfluorosulfonic Acid Ionomers in Proton-Exchange Membrane Fuel Cells at Low Relative Humidity. *ChemSusChem* **2020**. <https://doi.org/10.1002/cssc.201902875>.

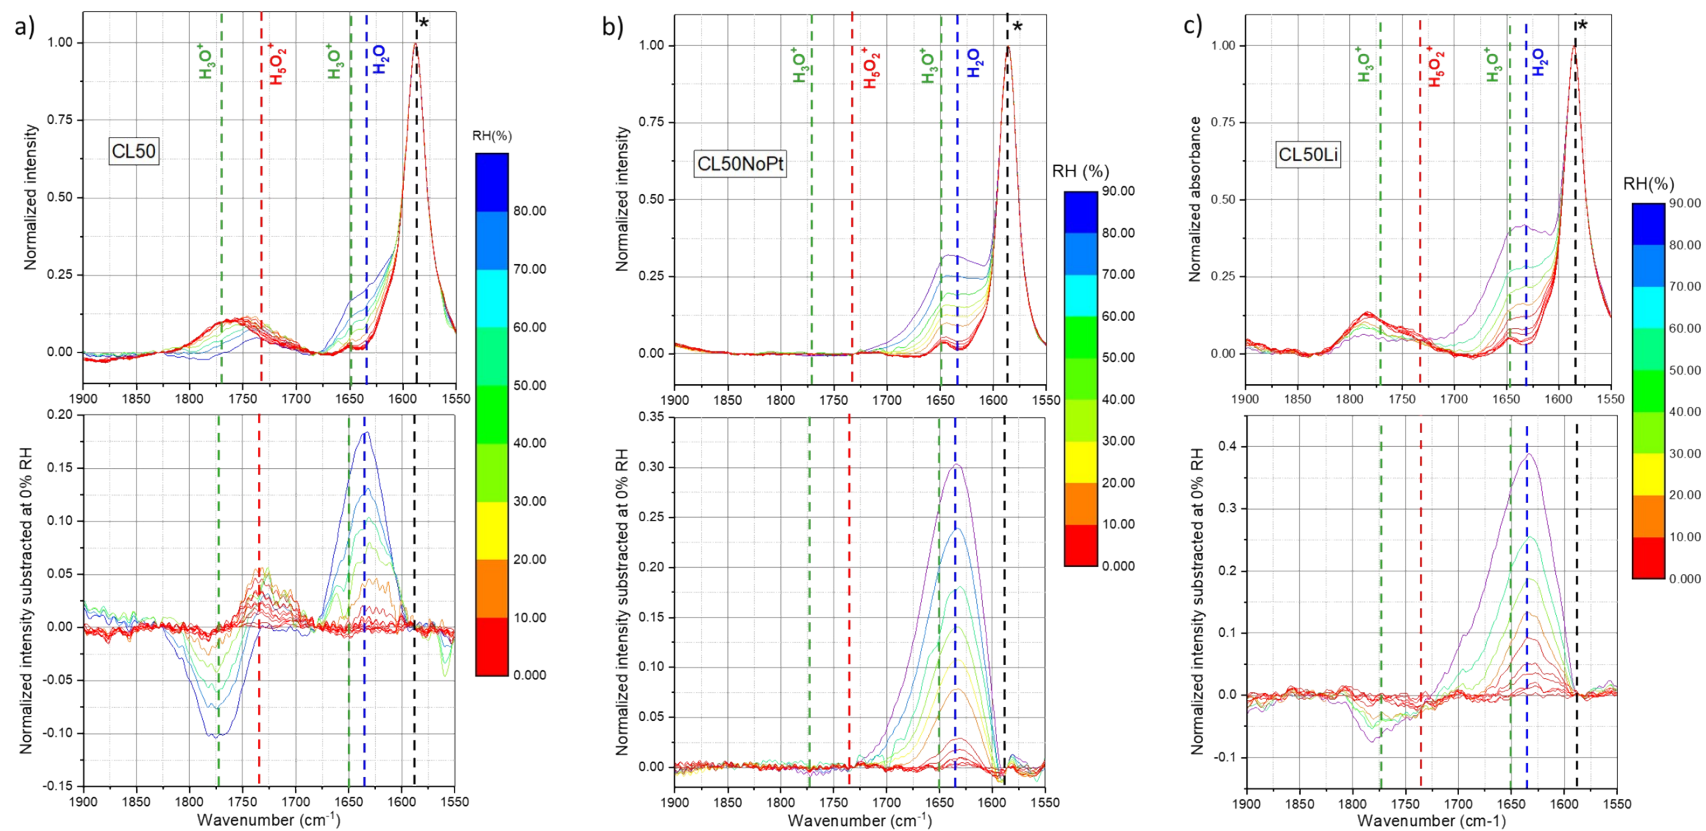

Figure S2: In situ MIR spectra of a) CL50, b) CL50NoPt, c) CL50Li in the range 1500-1900  $\text{cm}^{-1}$  (spectra normalized to ionomer backbone band at 1588  $\text{cm}^{-1}$ , subtracted spectra from its value at 0%RH): the characteristic bands of specific species ( $\text{H}_2\text{O}$ ,  $\text{H}_3\text{O}^+$ ,  $\text{H}_5\text{O}_2^+$ ) relative to the exposition of materials to humidity are indicated by dotted lines.

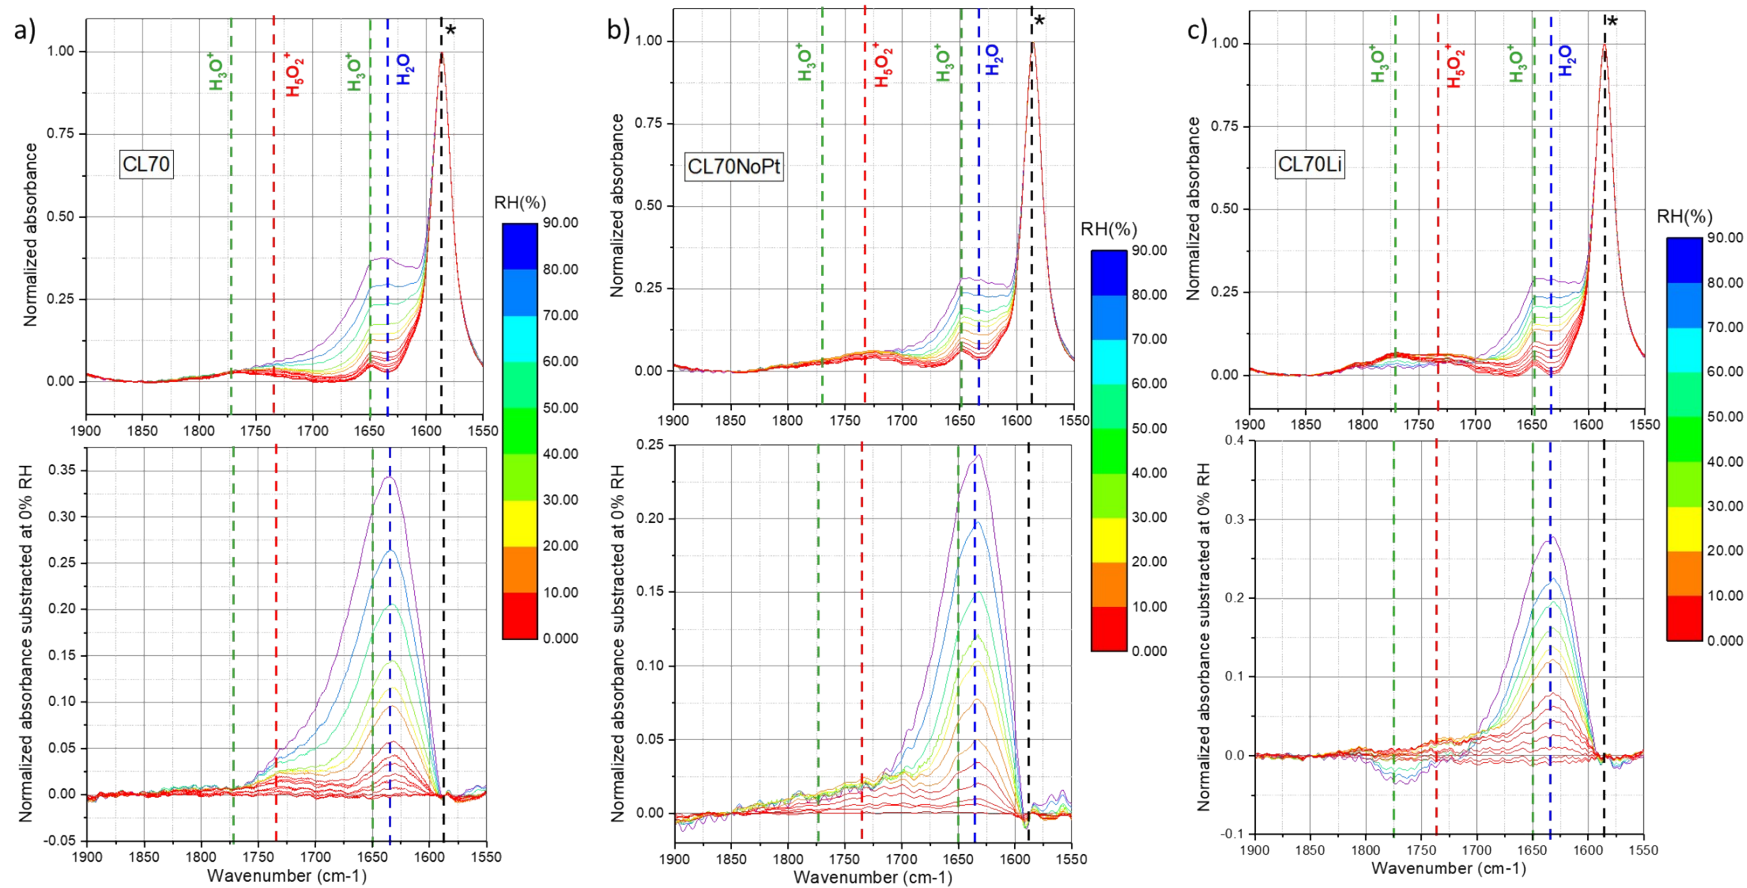

Figure S3: In situ MIR spectra of a) CL70, b) CL70NoPt, c) CL70Li in the range 1500-1900  $\text{cm}^{-1}$  (spectra normalized to ionomer backbone band at 1588  $\text{cm}^{-1}$ , subtracted spectra from its value at 0%RH): the characteristic bands of specific species ( $\text{H}_2\text{O}$ ,  $\text{H}_3\text{O}^+$ ,  $\text{H}_5\text{O}_2^+$ ) relative to the exposition of materials to humidity are indicated by dotted lines.
